# Supplementary material for: A Multi-Strain Probiotic Formulation Improves Intestinal Barrier Function by the Modulation of Tight and Adherent Junction Proteins
Source: MDPI journal article supplement (doi:10.3390/cells11162617), 2022-08-22
Supplement: s1 [file s1]

E-Cadherin (135 kDa) and  $\beta$ -Tubulin (55 kDa)

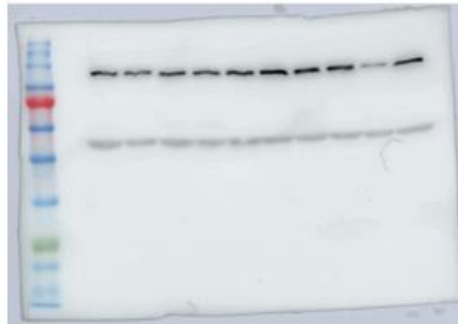

Occludin (65 kDa) and  $\beta$ -Tubulin (55 kDa)

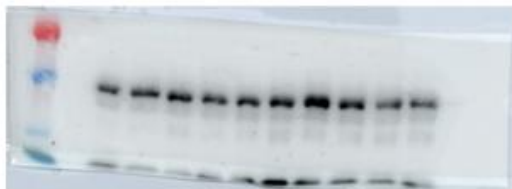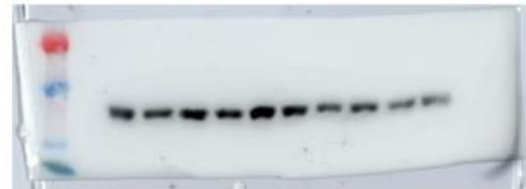

Claudin-1 (20 kDa) and  $\beta$ -Tubulin (55 kDa)

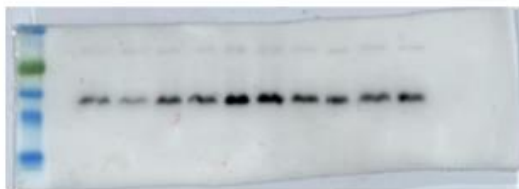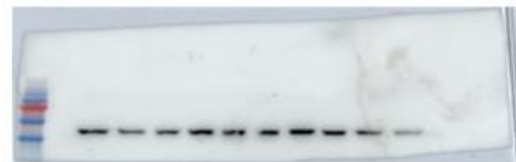

Claudin-2 (20 kDa) and  $\beta$ -Tubulin (55 kDa)

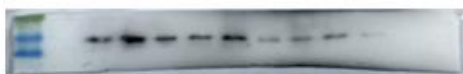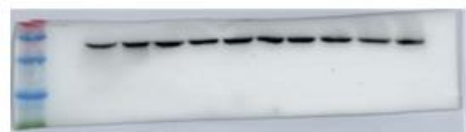

**Figure S1.** Uncut and unedited western blot membranes.
